# Supplementary material for: Molecular Characterization of ESBL-Producing Enterobacteriaceae in Northern Portugal
Source: PubMed Central journal article supplement (PMC3950362; doi:10.1155/2014/782897), 2014-02-13
Supplement: 782897.f1.pdf [file 782897.f1.pdf]

# Molecular characterization of ESBL-producing Enterobacteriaceae in the Northern Portugal

## SUPPLEMENTAL MATERIAL

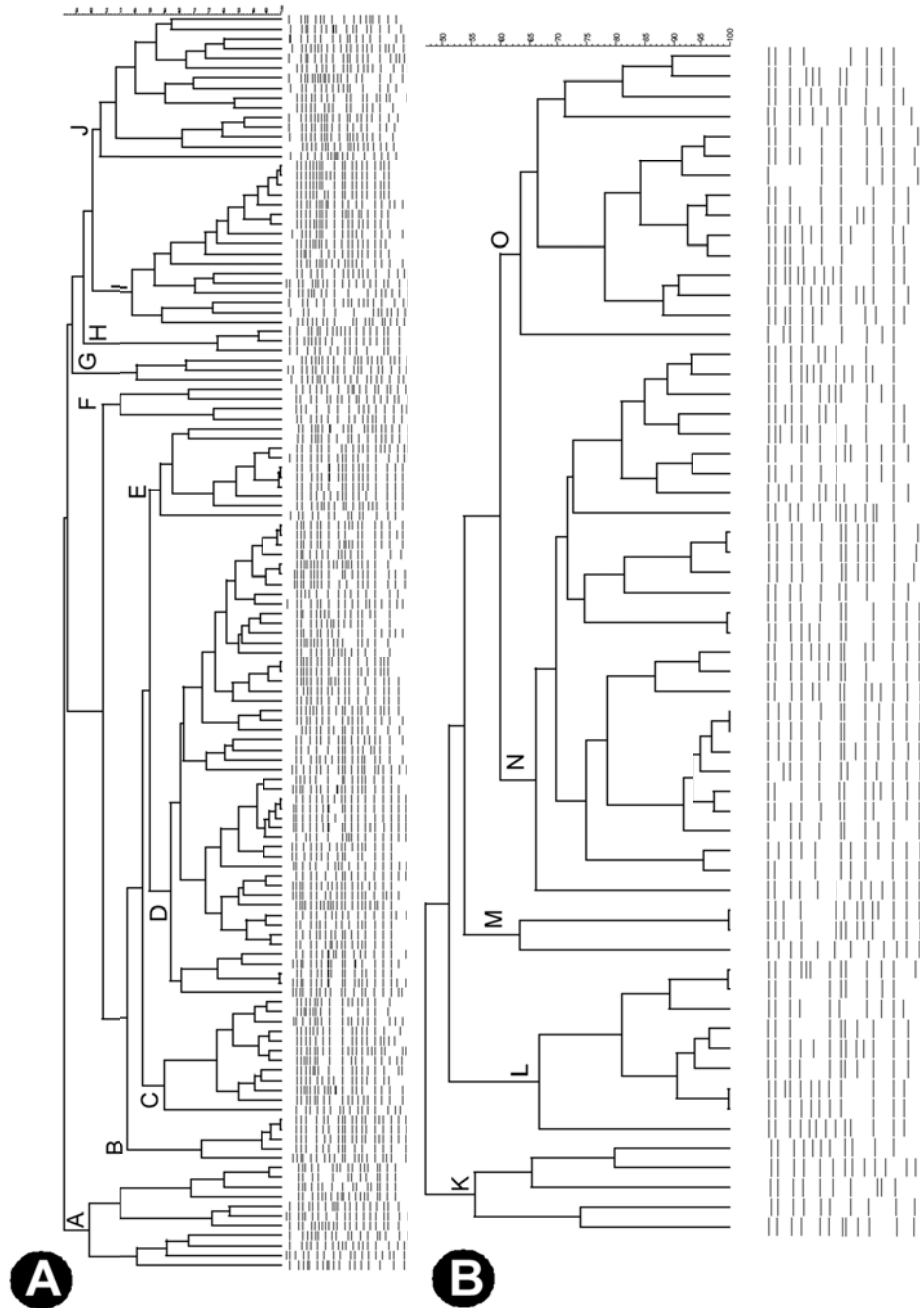

Figure: Enterobacterial repetitive intergenic consensus (ERIC) patterns of A: *Escherichia coli* and B: *Klebsiella pneumoniae*. This image shows high diversity among extended-spectrum beta-lactamases. Clusters A to H refer to ESBL-encoding *E. coli*. Clusters K to O refer to ESBL-encoding *K. pneumoniae*.
